# Supplementary material
Source: publisher site journal article supplement (https://www.degruyterbrill.com/publication/isbn/9783110335842/downloadAsset/9783110335842_Erratum%20TOC%20Vol2.pdf)
Supplement: Supplementary file 1 [file 9783110335842_Erratum%20TOC%20Vol2.pdf]

## Table of Contents

### Volume 2: Angkor in Cambodia. From Jungle Find to Global Icon

#### IX. The French-colonial Making of the *Parc Archéologique d'Angkor* 1

Giving the Archaeological Park of Angkor a critical history 1

1. Flattening the ground, mapping Angkor: Cartographic strategies  
(1860–1910) 9

2. Governmental decrees, first interventions, and the guidebooks:  
The spatiotemporal making of Angkor as an archaeological heritage reserve  
(1900–1930) 19

3. Re-making the temples of Angkor and the myth of anastylosis  
(1930–1973) 48

3.1. The 1920s at Angkor, Henri Marchal  
and the issue of “conservation” 51

3.2. Knowledge transfer and heritage diplomacy  
between French Indochina and the Dutch East Indies 60

3.3. Nicolas Balanos, the Acropolis, *anastylosis*,  
and the Athens Conference of 1931 84

3.4. Late colonial and early postcolonial archaeology  
in Angkor: Maurice Glaize and again Henri Marchal  
(the 1940s and 1950s) 98

3.5. An unfinished ‘enacted utopia of cultural heritage’:  
Bernard Philippe Groslier and his *reprise totale*  
of Angkor Wat (1960–1973) 123

#### X. Performing Grandeur – Re-enacting Angkor.

##### Cambodia’s Independence 1953–1970 under Norodom Sihanouk 153

Three comments, working questions, and definitions 153

1. A short introduction: *Samdech Upayuvareach* or Sihanouk, ‘the prince  
who left the throne’ to become a state leader. Political benchmarks between  
1941 and 1970 157

2. Norodom Sihanouk as the new Jayavarman VII: Buddhist socialism  
à la Angkorienne 164

3. The *Politique d'Eau*: Remaking Cambodia as a hydraulic empire 173

4. New Khmer Architecture: In the name of Angkor 184

5. Cultural (heritage) diplomacy: From cultural performance  
to the re-enactment of Angkor 204
